# Supplementary material
Source: ML conference proceedings conference paper supplement (https://openaccess.thecvf.com/content/CVPR2024/html/Wang_AllSpark_Reborn_Labeled_CVPR_2024_paper.html)
Supplement: Supplementary file 1 [file Wang_AllSpark_Reborn_Labeled_CVPR_2024_supplemental.pdf]

# AllSpark: Reborn Labeled Features from Unlabeled in Transformer for Semi-Supervised Semantic Segmentation

## Supplementary Material

**A. Ablation on Memory Queue Size.** As shown in Table a, we evaluated our method under various queue sizes. The results show that the  $1 \times C$  queue size yields the best result. Therefore, we adopted this size.

| Queue Size | $1/2 \times C$ | $1 \times C$ | $2 \times C$ | $4 \times C$ |
|------------|----------------|--------------|--------------|--------------|
| mIoU       | 77.63          | <b>78.41</b> | 77.98        | OOM          |

Table a.  $C$ : channel number, OOM: out of memory.

**B. More Visualizations (Figure a & b).**

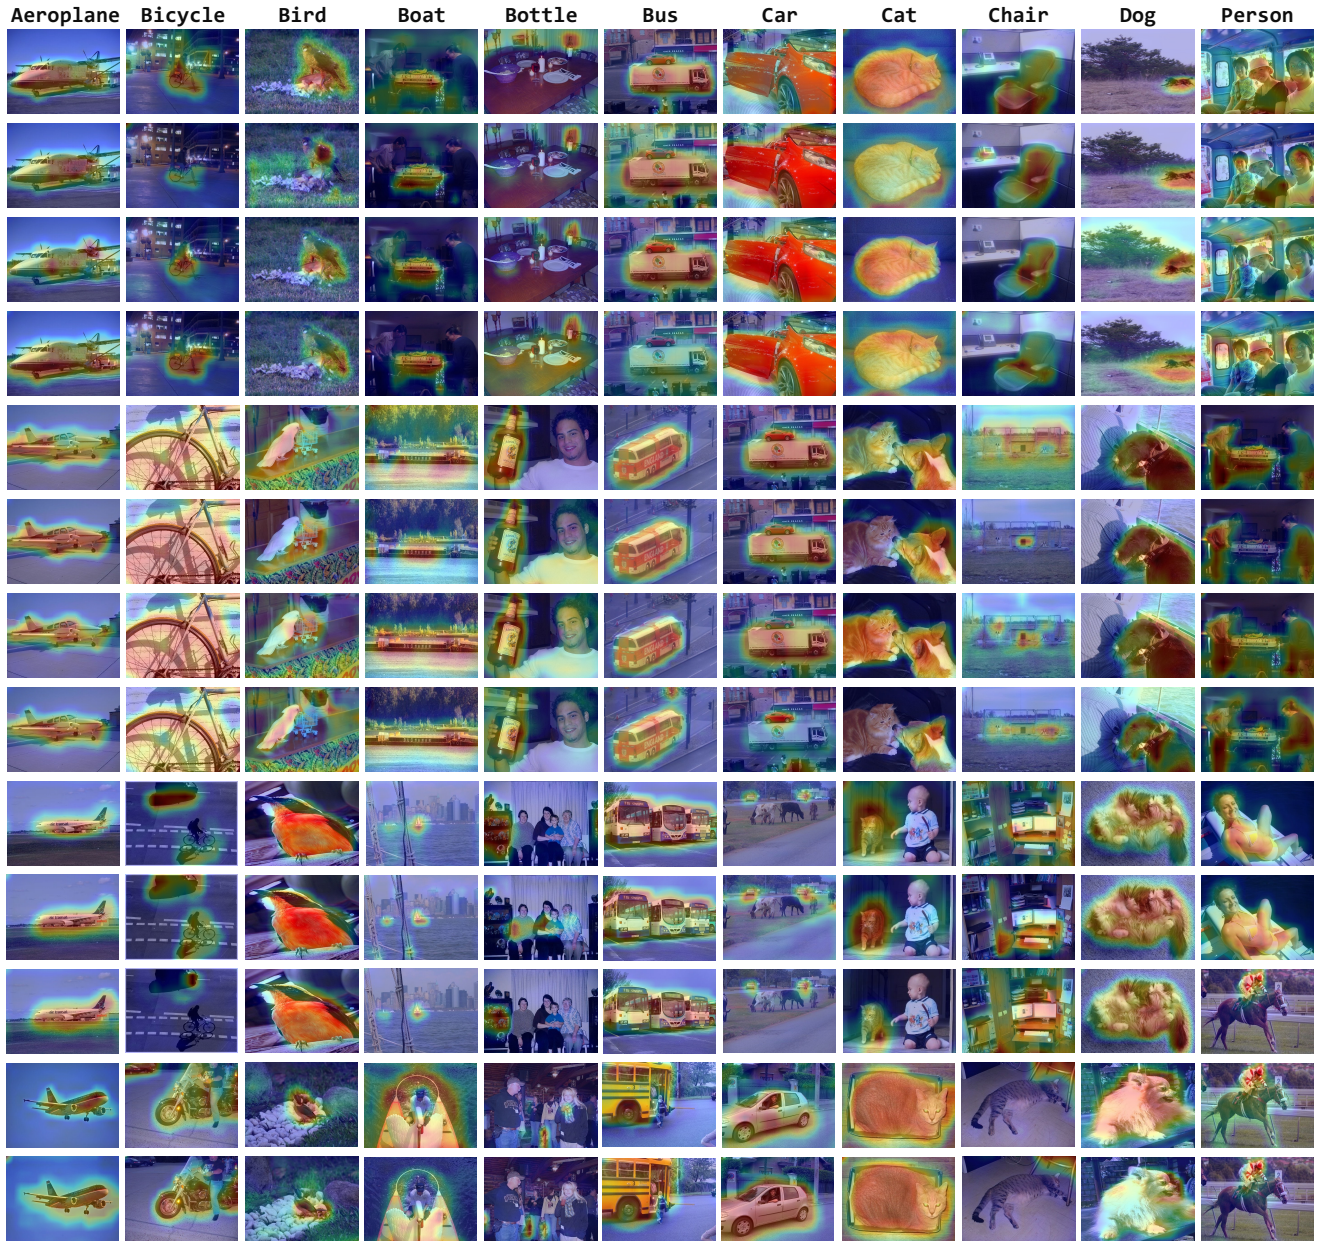

Figure a. More visualization of the features in Semantic Memory.

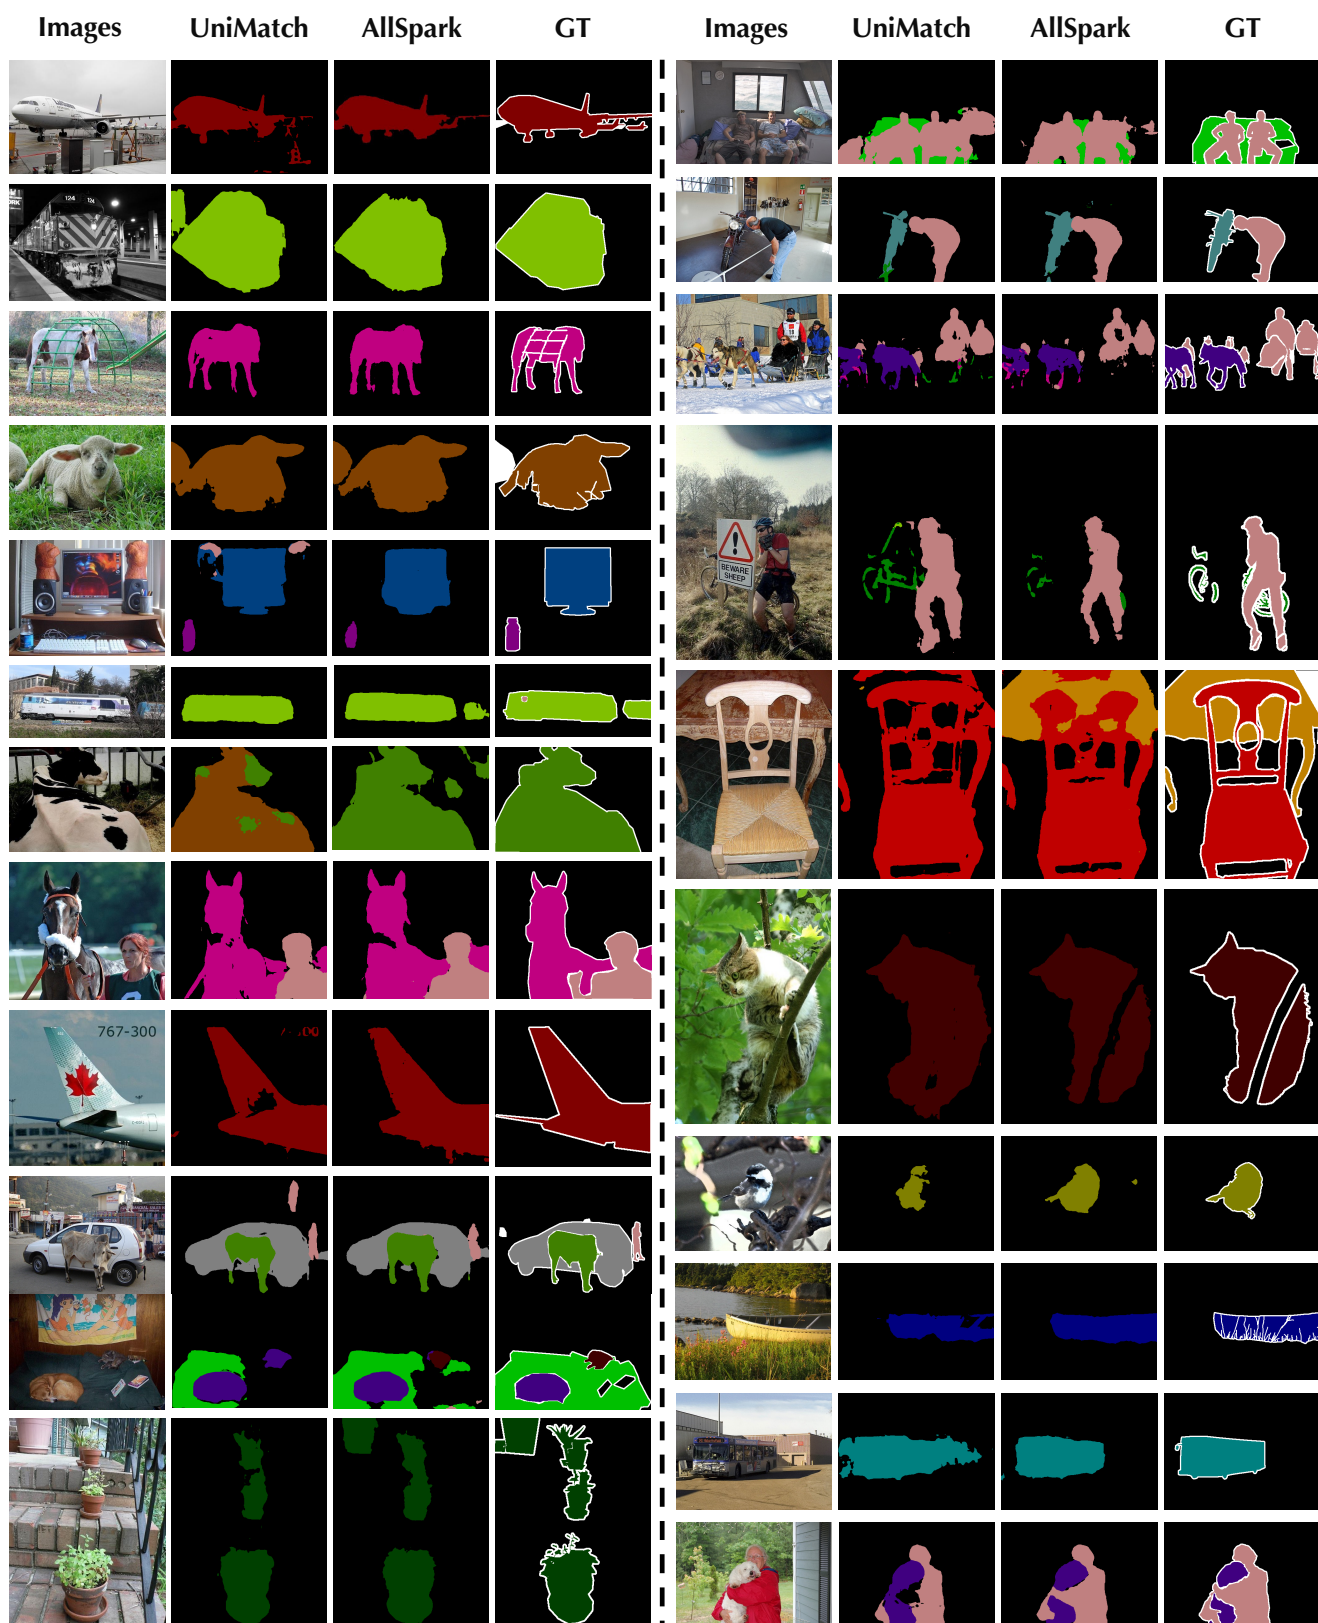

Figure b. Visualization of the segmentation results on **Pascal** validation set, compared with UniMatch [50].
